# Supplementary material for: High-fat feeding drives the intestinal production and assembly of C16:0 ceramides in chylomicrons
Source: PubMed Central journal article supplement — Sci Adv. 2024 Aug 23;10(34):eadp2254. doi: 10.1126/sciadv.adp2254 (PMC11343029; doi:10.1126/sciadv.adp2254), 2024-08-23
Supplement: sciadv.adp2254_sm.pdf [file sciadv.adp2254_sm.pdf]

Supplementary Materials for  
**High-fat feeding drives the intestinal production and assembly of C<sub>16:0</sub>  
ceramides in chylomicrons**

Michael SM Mah *et al.*

Corresponding author: Sarah M. Turpin-Nolan, Sarah.Turpin-Nolan@monash.edu;  
Mark A. Febbraio, Mark.Febbraio@monash.edu

*Sci. Adv.* **10**, eadp2254 (2024)  
DOI: 10.1126/sciadv.adp2254

**This PDF file includes:**

Figs. S1 to S7  
Tables S1 and S2

Figure S1. related to figure 2 and 3

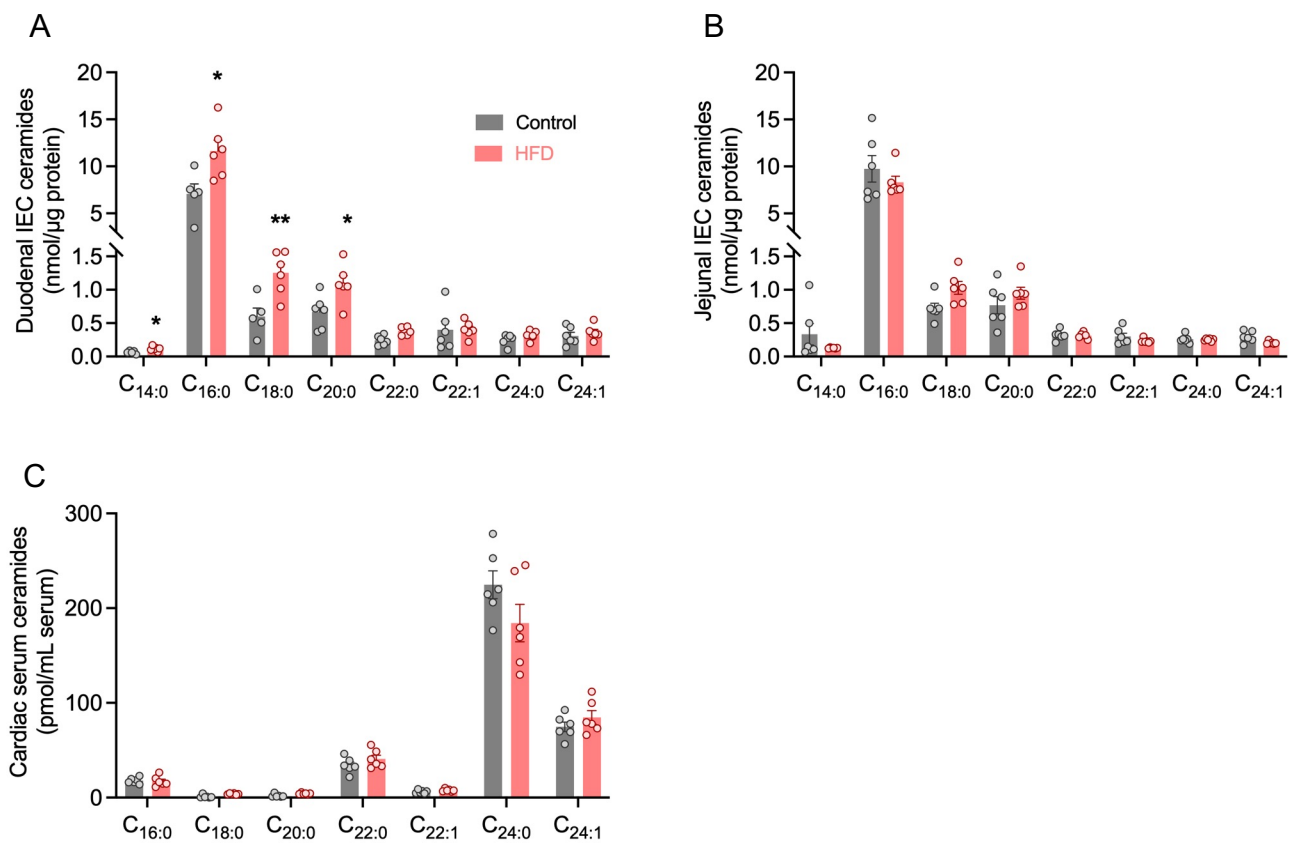

**Figure S1. Sham rat gut and systemic ceramide profiles are comparable to ceramide profiles from rats undergoing lymph cannulation.** Lipidomic quantitation of individual ceramides in (A) duodenal, (B) jejunal epithelial cells and (C) cardiac serum from rats fed either a control or high-fat diet (n=6/group). Data are expressed as means ± SEM. \* $P < 0.05$ , \*\* $P < 0.01$ .

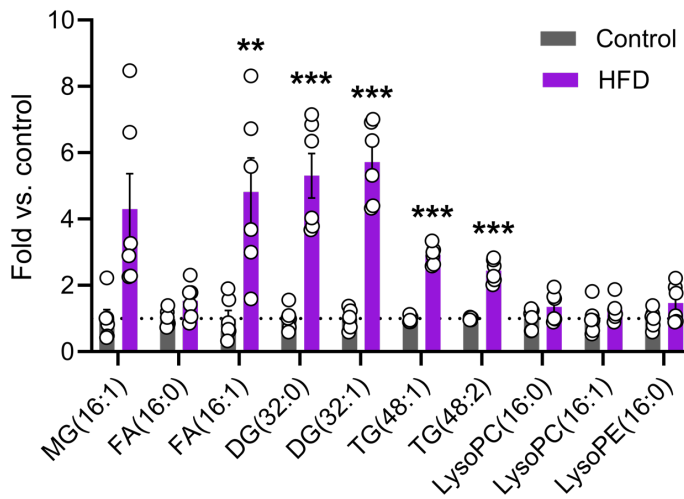

**Figure S2. High-fat feeding amplifies C<sub>16:0</sub> fatty acid processing of multiple lipid species in mesenteric lymph-derived chylomicrons.** Untargeted lipidomic quantitation of lipids containing a C<sub>16:0</sub> fatty acid chain in chylomicron from control and high-fat diet-fed rats (n=6/group). Data are expressed as means ± SEM. \*\**P* < 0.01, \*\*\**P* < 0.001.

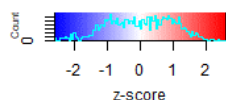

## FA.MG.DG.TG

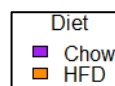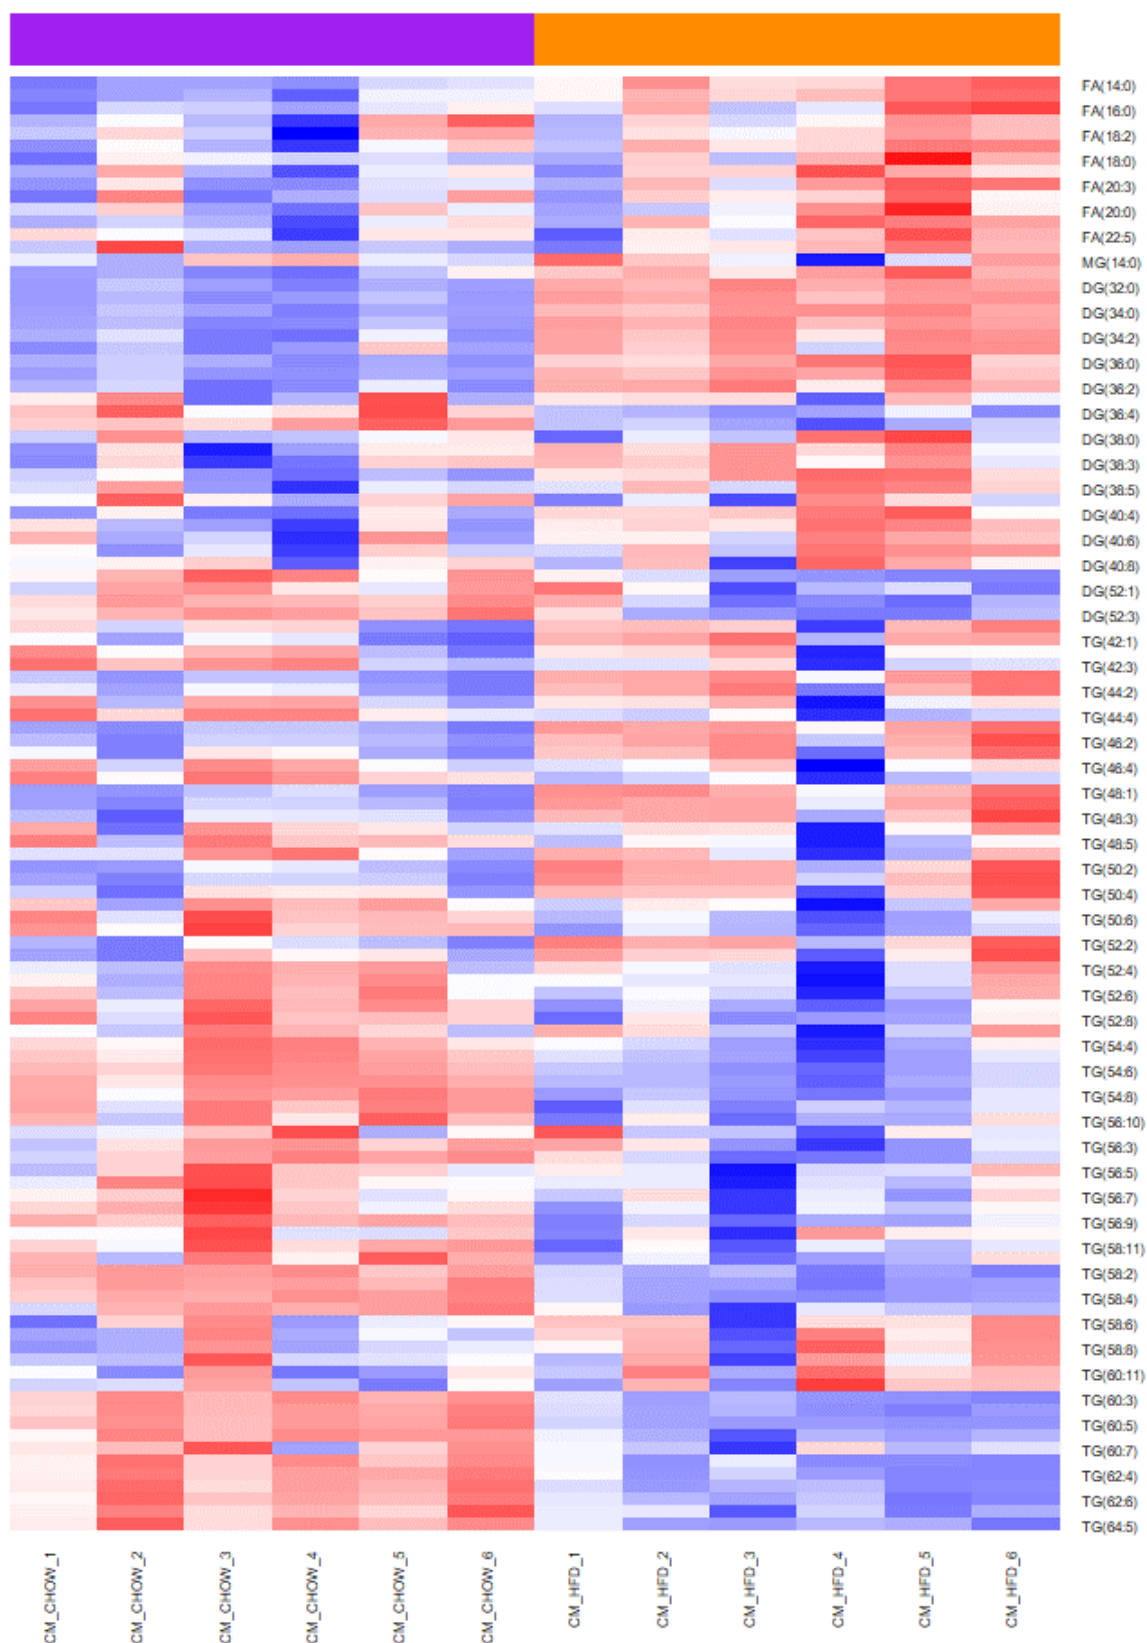

**Figure S3. High-fat feeding alters the chylomicron lipidome.** Untargeted, semi-quantitative, lipidomic data clustering of mesenteric lymph-derived chylomicrons from control and high-fat diet-fed rats. Hierarchical clustering analysis (heat map) of lipid analytes from the following classes: fatty acyls, monoacylglycerols, diacylglycerols, and triacylglycerols.

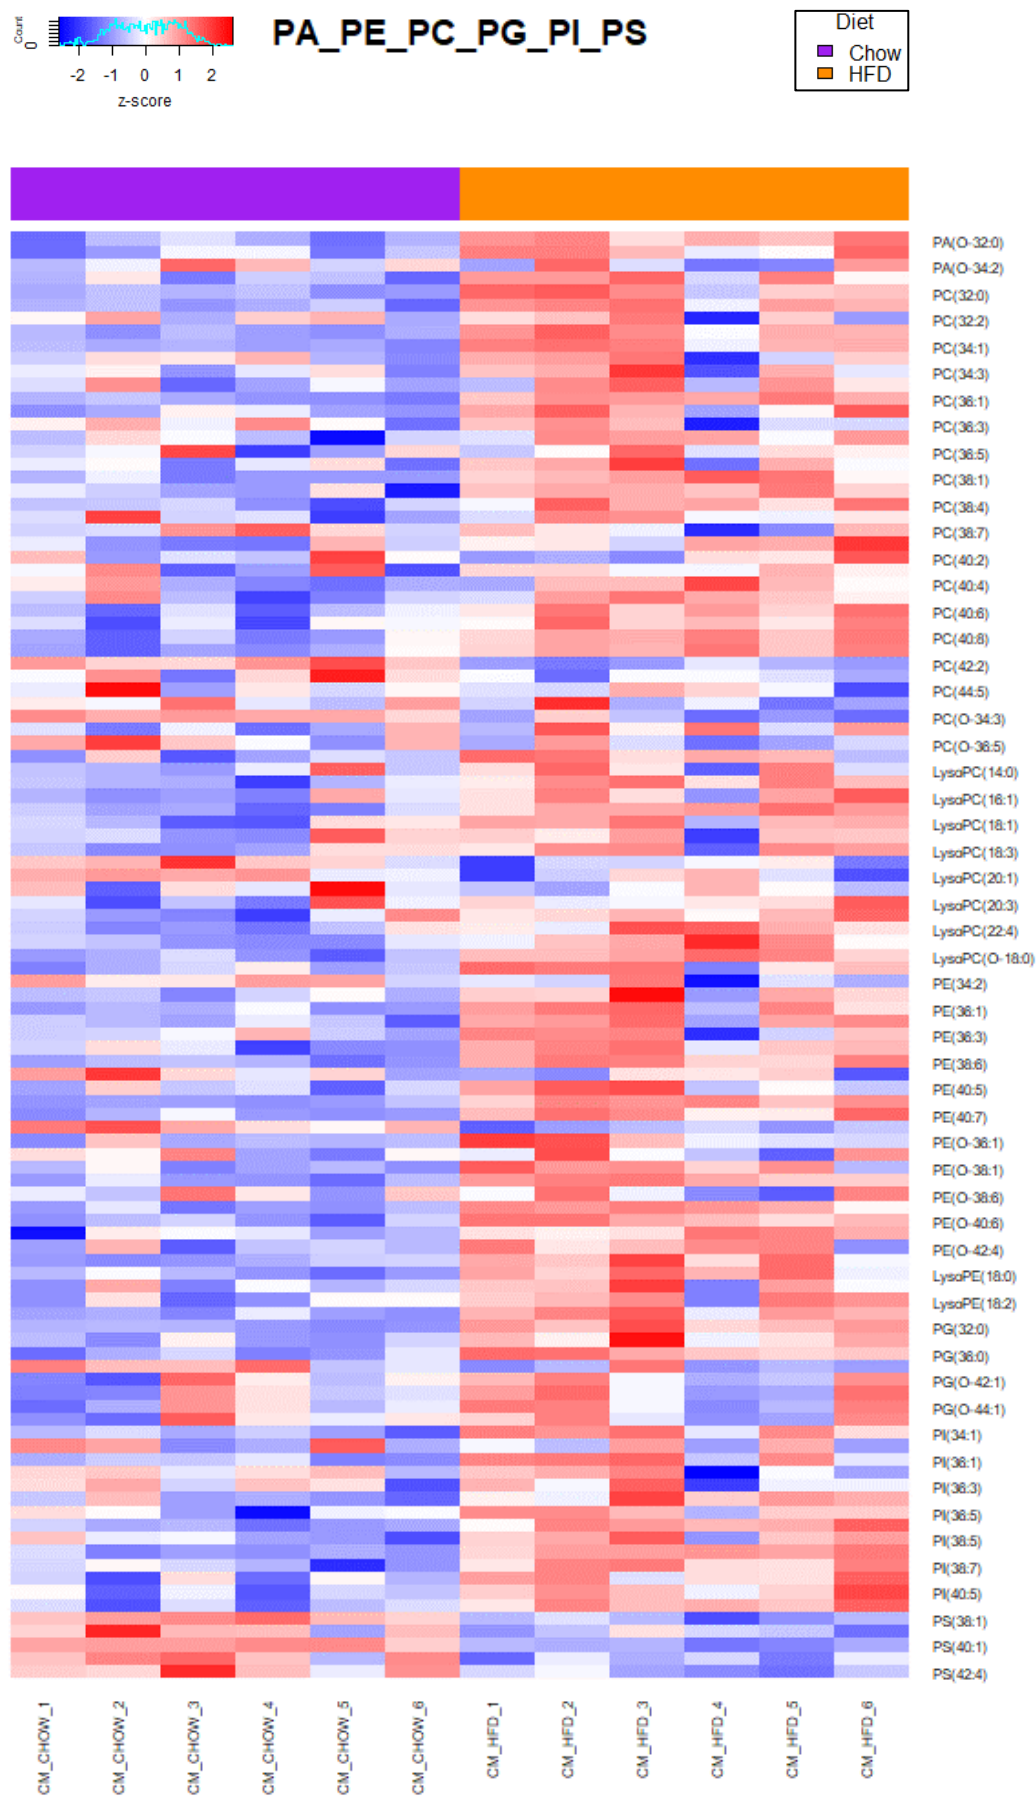

**Figure S4. High-fat feeding alters the chylomicron lipidome.** Untargeted, semi-quantitative, lipidomic data clustering of mesenteric lymph-derived chylomicrons from control and high-fat diet-fed rats. Hierarchical clustering analysis (heat map) of lipid analytes from the following classes: phosphates (PA), phosphocholines (PC), phosphoethanolamines (PE), phosphoglycerols (PG), phosphoinositols (PI), and phosphoserines (PS).

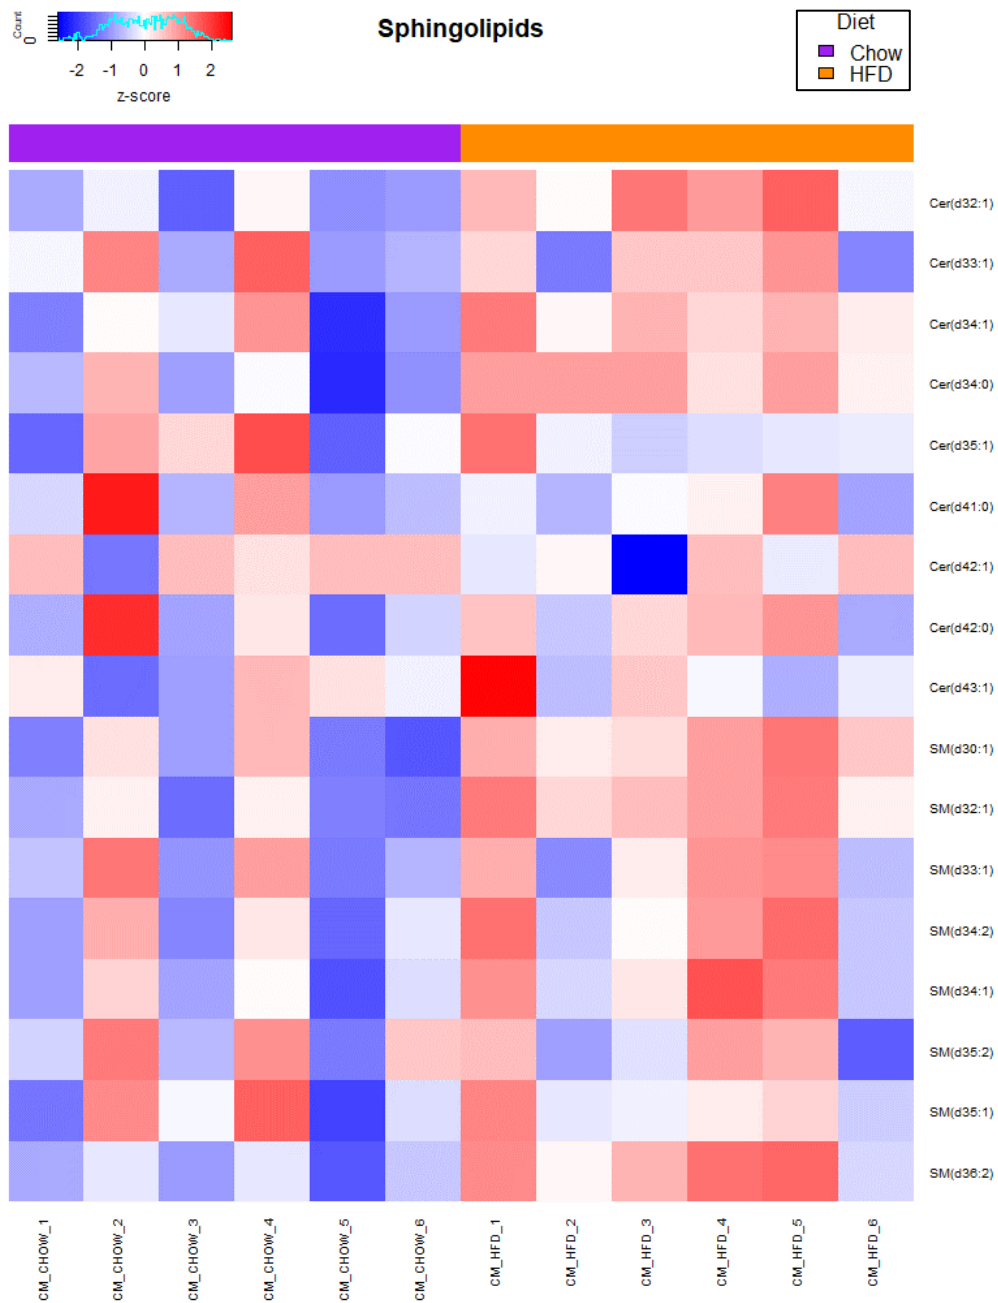

**Figure S5. High-fat feeding alters the chylomicron lipidome.** Untargeted, semi-quantitative, lipidomic data clustering of mesenteric lymph-derived chylomicrons from control and high-fat diet-fed rats. Hierarchical clustering analysis (heat map) of lipid analytes from the following classes: sphingolipids.

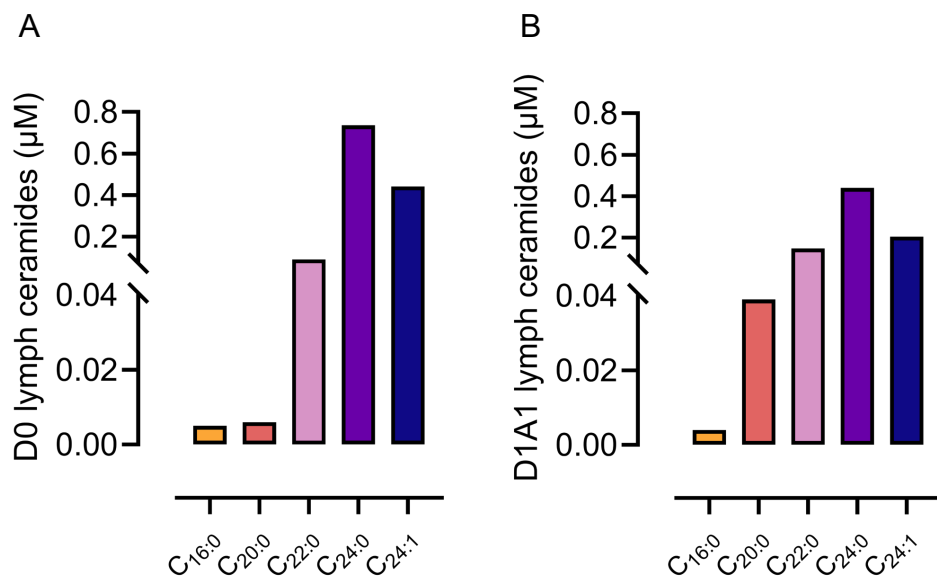

**Figure S6. Comparison of two pre-lipid infusion timepoints reveal slight differences in ceramide accumulation in human thoracic lymph.** Human thoracic lymph C<sub>16:0</sub>, C<sub>20:0</sub>, C<sub>22:0</sub>, C<sub>24:0</sub> and C<sub>24:1</sub> ceramide levels at D0 and D1A1 timepoints captured prior to enteral lipid infusion in one patient.

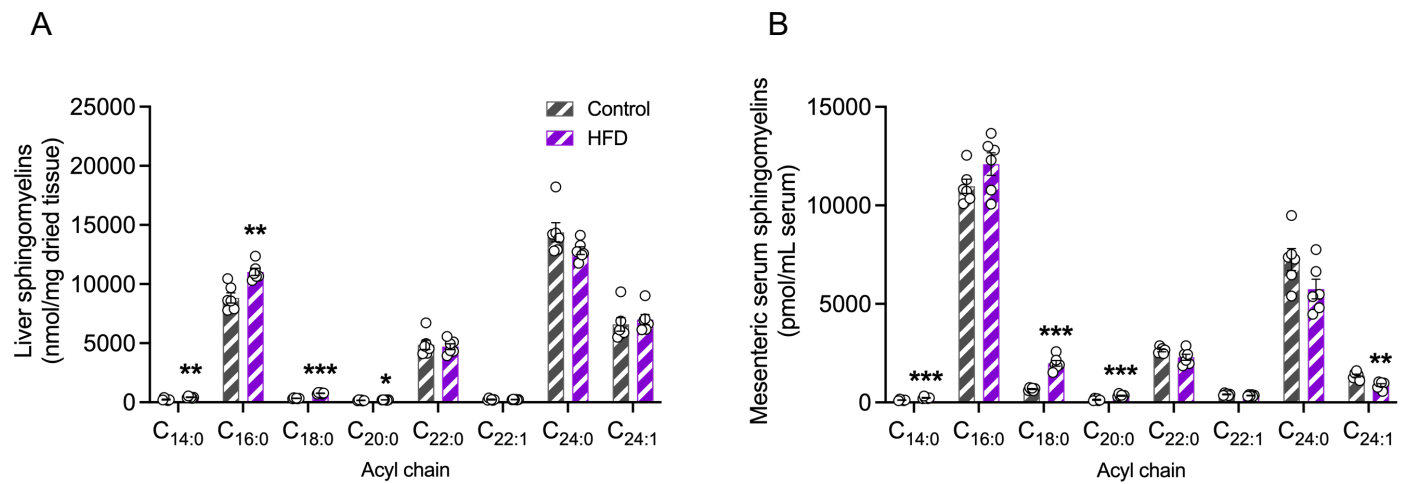

**Figure S7. Hepatic and mesenteric serum sphingomyelin levels.**

Lipidomic quantitation of individual sphingomyelins in (A) liver and (B) mesenteric serum from rats fed either a control or high fat diet (HFD). The following numbers of biological replicates were used (independent rats) per diet group in each experiment: n=6. Data are expressed as means  $\pm$  SEM.

\*P < 0.05, \*\*P < 0.01, \*\*\*P < 0.001.



**Table S1**Human thoracic lymph DG and TG ( $\mu\text{M}$ )

| DG/TG species | Lipid dose (mL/hr) |       |       |
|---------------|--------------------|-------|-------|
|               | 0                  | 20    | 80    |
| DG(32:1)      | 3.55               | 2.74  | 1.71  |
| DG(32:2)      | 1.44               | 1.18  | 0.651 |
| DG(34:1)      | 12.8               | 8.2   | 11.1  |
| DG(34:3)      | 1.74               | 1.22  | 1.5   |
| DG(36:2)      | 12.3               | 18.9  | 37.8  |
| DG(36:3)      | 10.4               | 12.5  | 21.3  |
| DG(36:4)      | 3.66               | 5.16  | 8.93  |
| DG(38:0)      |                    |       |       |
| DG(38:5)      | 1.4                | 0.662 | 0.61  |
| DG(39:0)      | 0.722              | 0.514 | 0.246 |
| DG(41:1)      | 0.391              | 0.245 | 0.18  |
| DG(42:0)      | 0.002              | 0.003 | 0.004 |
| DG(42:1)      | 0.003              | 0.119 | 0.094 |
| DG(42:2)      | 0.063              | 0.298 | 0.19  |
| DG(44:3)      |                    | 0.28  | 0.619 |
| DG-O(32:2)    | 0.975              | 3.84  | 5.48  |
| DG-O(34:1)    | 5.66               | 50.5  | 143   |
| DG-O(36:4)    | 0.544              | 1.08  | 3.99  |
| TG(44:1)      | 8.55               | 66.2  | 73.2  |
| TG(44:2)      | 3.76               | 112   | 224   |
| TG(44:4)      | 0.208              | 29.4  | 56.2  |
| TG(46:2)      | 6.81               | 145   | 249   |
| TG(48:1)      | 23.3               | 39.6  | 7.13  |
| TG(48:2)      | 15.2               | 37    | 17.8  |
| TG(48:3)      | 4.18               | 15.6  | 8.46  |
| TG(49:1)      | 3.74               | 6.11  | 1.75  |
| TG(49:2)      | 2.34               | 4.08  | 2.21  |
| TG(50:1)      | 54.4               | 54.7  | 36.1  |
| TG(50:2)      | 53                 | 78.8  | 64.7  |
| TG(50:3)      | 19.7               | 37.3  | 30.7  |
| TG(50:4)      | 6.97               | 15.4  | 13.9  |
| TG(51:1)      | 3.05               | 2.66  | 1.43  |
| TG(51:2)      | 5.58               | 9     | 7.85  |
| TG(51:3)      | 2.86               | 5.36  | 5.79  |
| TG(51:4)      | 0.88               | 2.04  | 2.37  |
| TG(51:5)      | 0.3                | 1.01  | 0.923 |
| TG(52:2)      | 119                | 160   | 336   |
| TG(52:3)      | 102                | 166   | 238   |
| TG(52:4)      | 36                 | 74.8  | 115   |
| TG(52:5)      | 7.33               | 20.9  | 32.4  |

|          |       |       |       |
|----------|-------|-------|-------|
| TG(52:6) | 1.93  | 7.02  | 10.8  |
| TG(52:7) | 0.041 | 2.83  | 3.73  |
| TG(53:3) | 3.45  | 5.3   | 7.27  |
| TG(53:4) | 1.6   | 2.96  | 4.28  |
| TG(53:5) | 0.682 | 1.69  | 2.02  |
| TG(53:6) | 0.228 | 1.07  | 0.994 |
| TG(54:2) | 7.99  | 0.03  | 0.064 |
| TG(54:3) | 39.8  | 80    | 156   |
| TG(54:4) | 33.4  | 276   | 663   |
| TG(54:5) | 18.4  | 157   | 340   |
| TG(54:6) | 9.7   | 60.3  | 119   |
| TG(54:7) | 2.75  | 16.9  | 33    |
| TG(55:6) | 0.581 | 1.01  | 1.17  |
| TG(55:7) | 0.394 | 0.62  | 1.07  |
| TG(55:8) | 0.01  | 0.213 | 0.49  |
| TG(55:9) | 0.007 | 0.18  | 0.194 |
| TG(56:6) | 7     | 9.19  | 10.9  |
| TG(56:7) | 8.83  | 19    | 32.5  |
| TG(56:8) | 3.81  | 9.67  | 14.8  |
| TG(56:9) | 0.459 | 2.36  | 4.42  |

Human thoracic lymph sphingolipids ( $\mu\text{M}$ )

| Ceramide species      | Lipid dose (mL/hr) |       |       |
|-----------------------|--------------------|-------|-------|
|                       | 0                  | 20    | 80    |
| C16:0                 | 0.004              | 0.025 | 0.104 |
| C20:0                 | 0.039              | 0.01  | 0.031 |
| C22:0                 | 0.147              | 0.042 | 0.097 |
| C24:0                 | 0.44               | 0.364 | 0.407 |
| C24:1                 | 0.204              | 0.27  | 0.235 |
|                       |                    |       |       |
| Sphingomyelin species |                    |       |       |
| C14:0                 | 2.86               | 2.41  | 2.51  |
| C16:0                 | 38.8               | 32.5  | 31.7  |
| C18:0                 | 7.4                | 6.8   | 4.55  |
| C20:0                 | 4.12               | 3.65  |       |
| C22:0                 | 6.43               | 4.58  | 0.013 |
| C22:1                 | 5.94               | 5.42  | 4.83  |
| C24:0                 | 4.01               | 2.64  | 2.96  |
| C24:1                 | 11.3               | 8.6   | 7.23  |

**Table S2.** Human thoracic lymph sphingolipids ( $\mu\text{M}$ ) during increasing rates of enteral lipid infusion.

|                                                         | Lipid dose (mL/hr) |       |       |
|---------------------------------------------------------|--------------------|-------|-------|
|                                                         | 0                  | 20    | 80    |
| <b>Ceramide species (<math>\mu\text{M}</math>)</b>      |                    |       |       |
| <b>C16:0</b>                                            | 0.004              | 0.025 | 0.104 |
| <b>C20:0</b>                                            | 0.039              | 0.01  | 0.031 |
| <b>C22:0</b>                                            | 0.147              | 0.042 | 0.097 |
| <b>C24:0</b>                                            | 0.44               | 0.364 | 0.407 |
| <b>C24:1</b>                                            | 0.204              | 0.27  | 0.235 |
|                                                         |                    |       |       |
| <b>Sphingomyelin species (<math>\mu\text{M}</math>)</b> |                    |       |       |
| <b>C14:0</b>                                            | 2.86               | 2.41  | 2.51  |
| <b>C16:0</b>                                            | 38.8               | 32.5  | 31.7  |
| <b>C18:0</b>                                            | 7.4                | 6.8   | 4.55  |
| <b>C20:0</b>                                            | 4.12               | 3.65  |       |
| <b>C22:0</b>                                            | 6.43               | 4.58  | 0.013 |
| <b>C22:1</b>                                            | 5.94               | 5.42  | 4.83  |
| <b>C24:0</b>                                            | 4.01               | 2.64  | 2.96  |
| <b>C24:1</b>                                            | 11.3               | 8.6   | 7.23  |
